# Supplementary material for: Antifluorite-type Na5FeO4 as a low-cost, environment-friendly cathode with combined cationic/anionic redox activity for sodium ion batteries: a first-principles investigation
Source: Royal Society of Chemistry journal article supplement (doi:10.1039/d2ra01834a), 2022-01-01
Supplement: d2ra01834a1.pdf [file d2ra01834a1.pdf]

Electronic Supplementary Information (ESI):  
Antifluorite-type  $\text{Na}_5\text{FeO}_4$  as a low-cost,  
environment-friendly cathode with combined  
cationic/anionic redox activity for sodium ion  
batteries: A first-principles investigation

Rasmus Vester Thøgersen, Federico Bianchini,  
Helmer Fjellvåg, Ponniah Vajeeston\*

<sup>a</sup>Centre for Materials Science and Nanotechnology, Department of Chemistry, University of Oslo,  
P.O. Box 1033 Blindern, N-0315 Oslo, Norway.

\*To whom correspondence should be addressed:  
vajeeston.ponniah@smn.uio.no

## 1 Supplementary figures

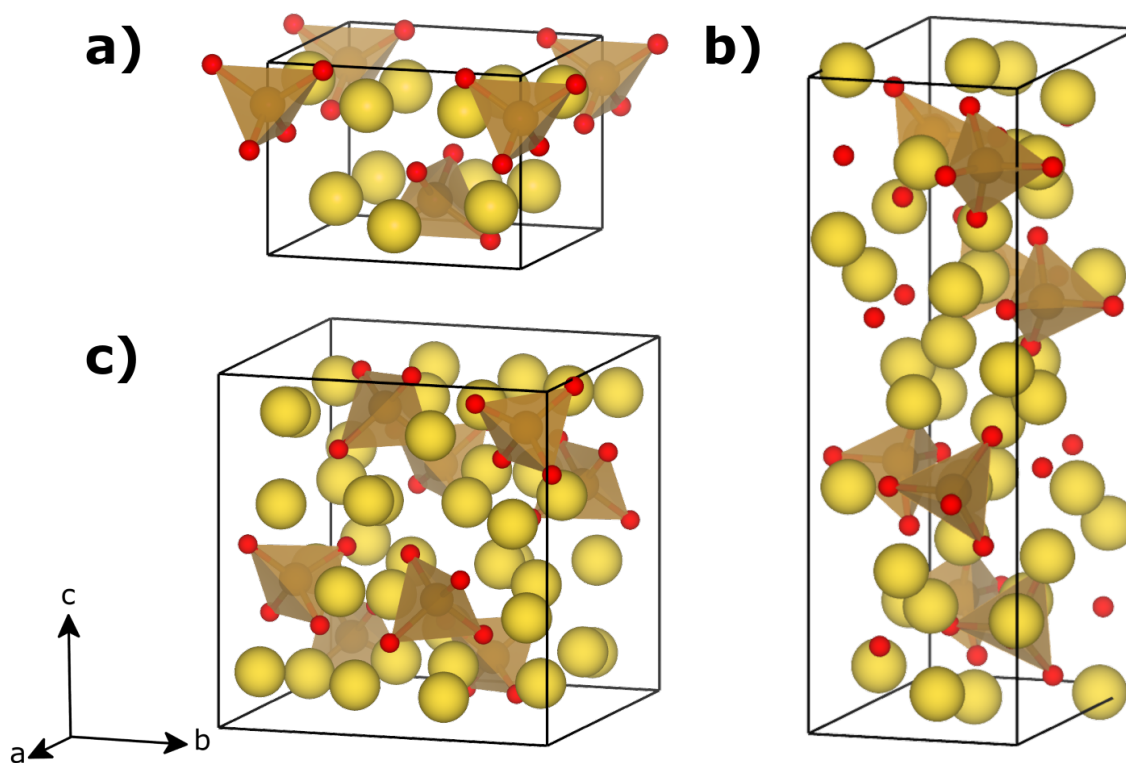

Figure S1: Primitive unit cells of the relaxed low-energy structures, where Na is yellow, Fe is brown and O is red. a)  $\beta$ -Na<sub>5</sub>FeO<sub>4</sub> (*Pmmn*), b)  $\alpha$ -Na<sub>5</sub>FeO<sub>4</sub> (*Pbca*) and c)  $\gamma$ -Na<sub>5</sub>FeO<sub>4</sub> (*Pbca*). Structural data given in Table S4.

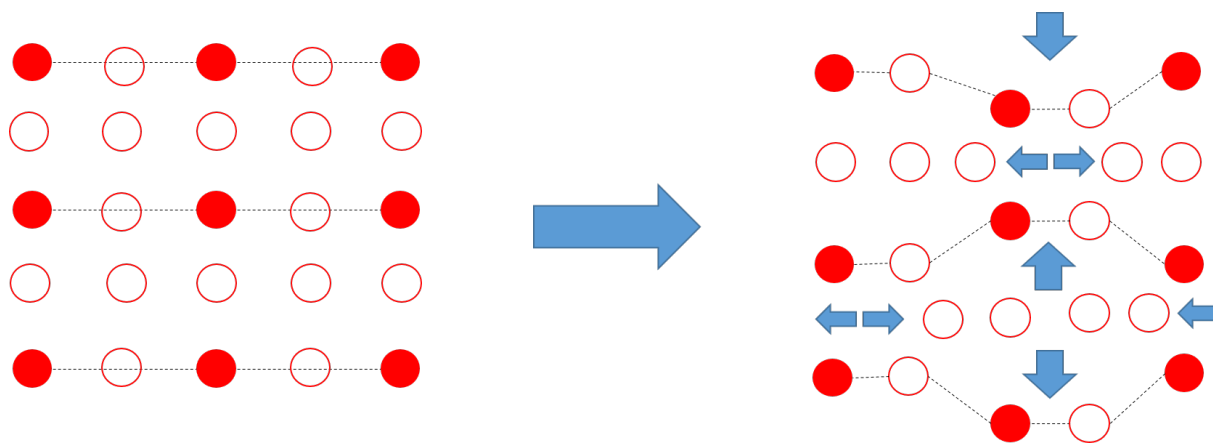

Figure S2: Schematic showing the relationship between the oxygen sublattice in the ideal anti-fluorite structure and the distorted structure of  $\gamma\text{-Na}_5\text{FeO}_4$ . Notice the alternating depressions and expansions for each octant.

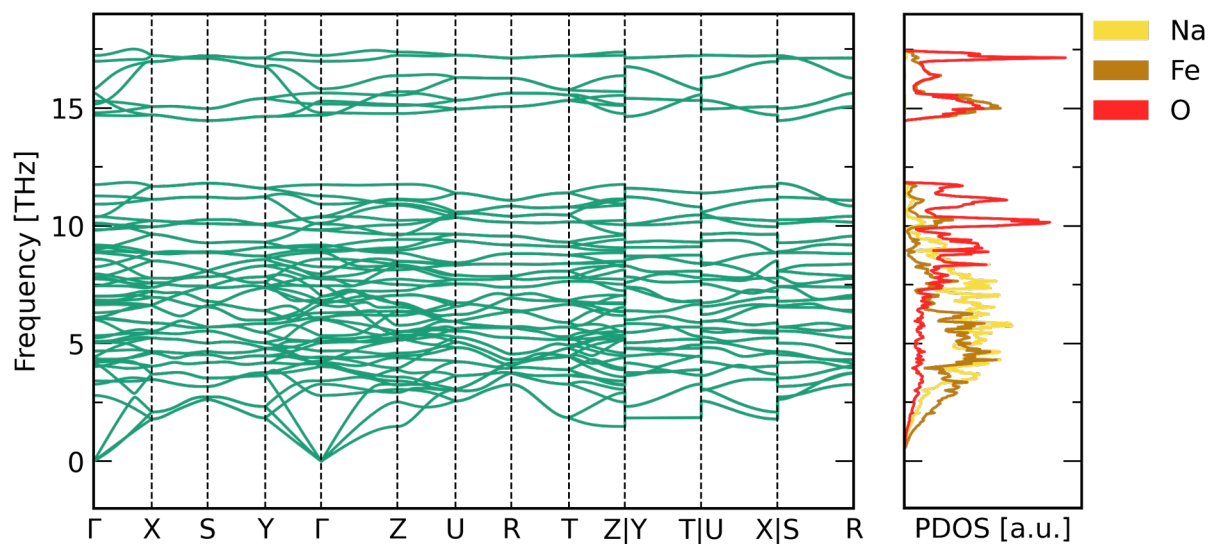

Figure S3: The phonon dispersion relation and phonon density of states for  $\beta\text{-Na}_5\text{FeO}_4$ .

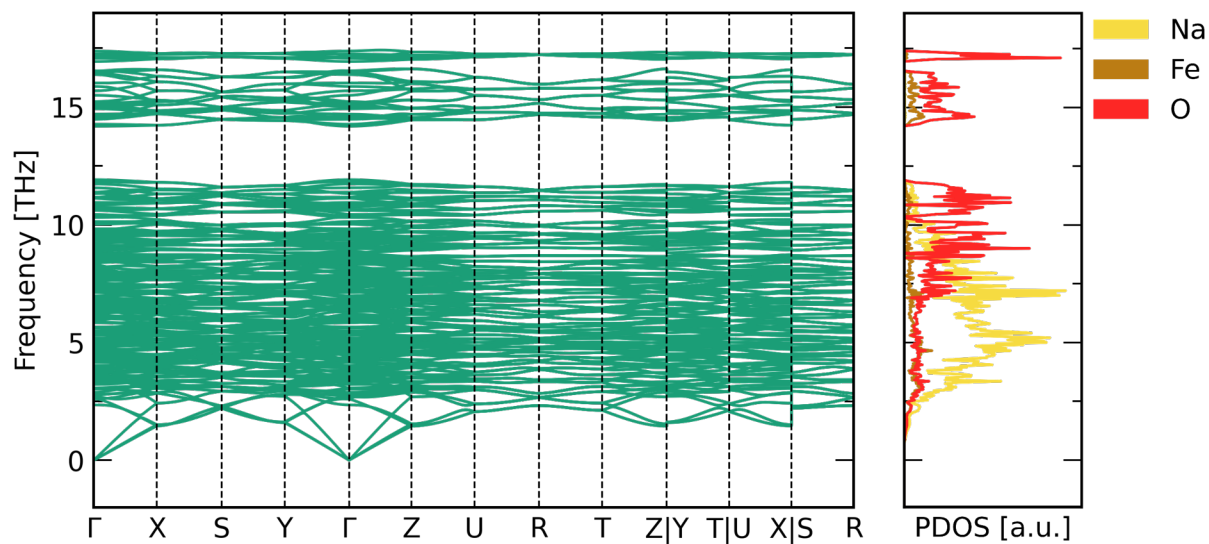

Figure S4: The phonon dispersion relation and phonon density of states for  $\alpha$ - $\text{Na}_5\text{FeO}_4$ .

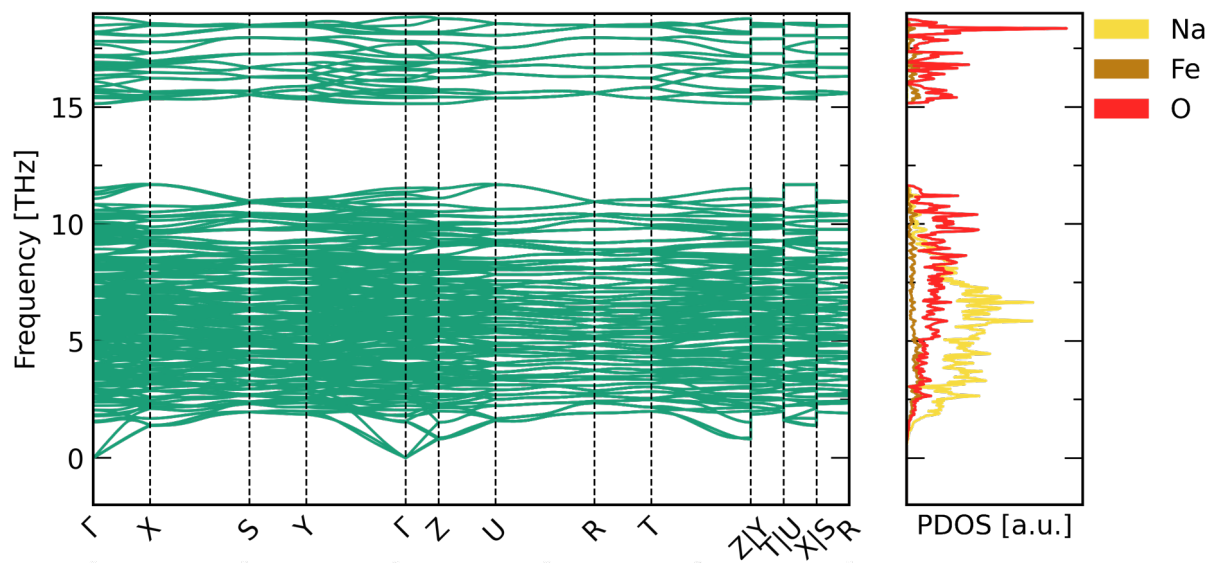

Figure S5: The phonon dispersion relation and phonon density of states for the  $\gamma$ - $\text{Na}_5\text{FeO}_4$ .



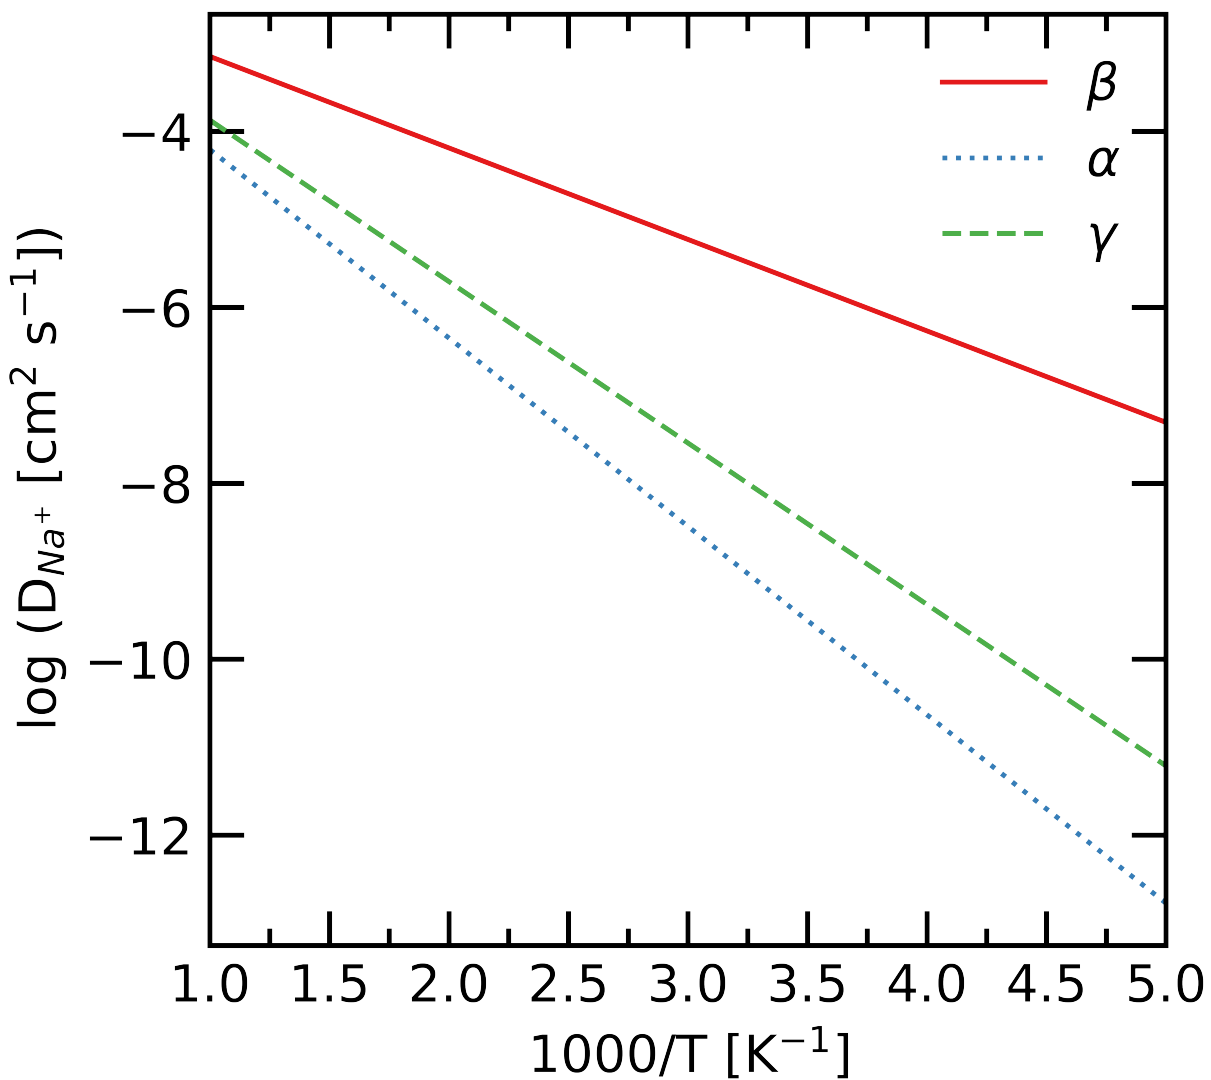

Figure S6: Arrhenius plot of the diffusion coefficients as a function of temperature based on the limiting jump along the most facile diffusion paths for each polymorph. The attempt frequency is set to 10 THz.

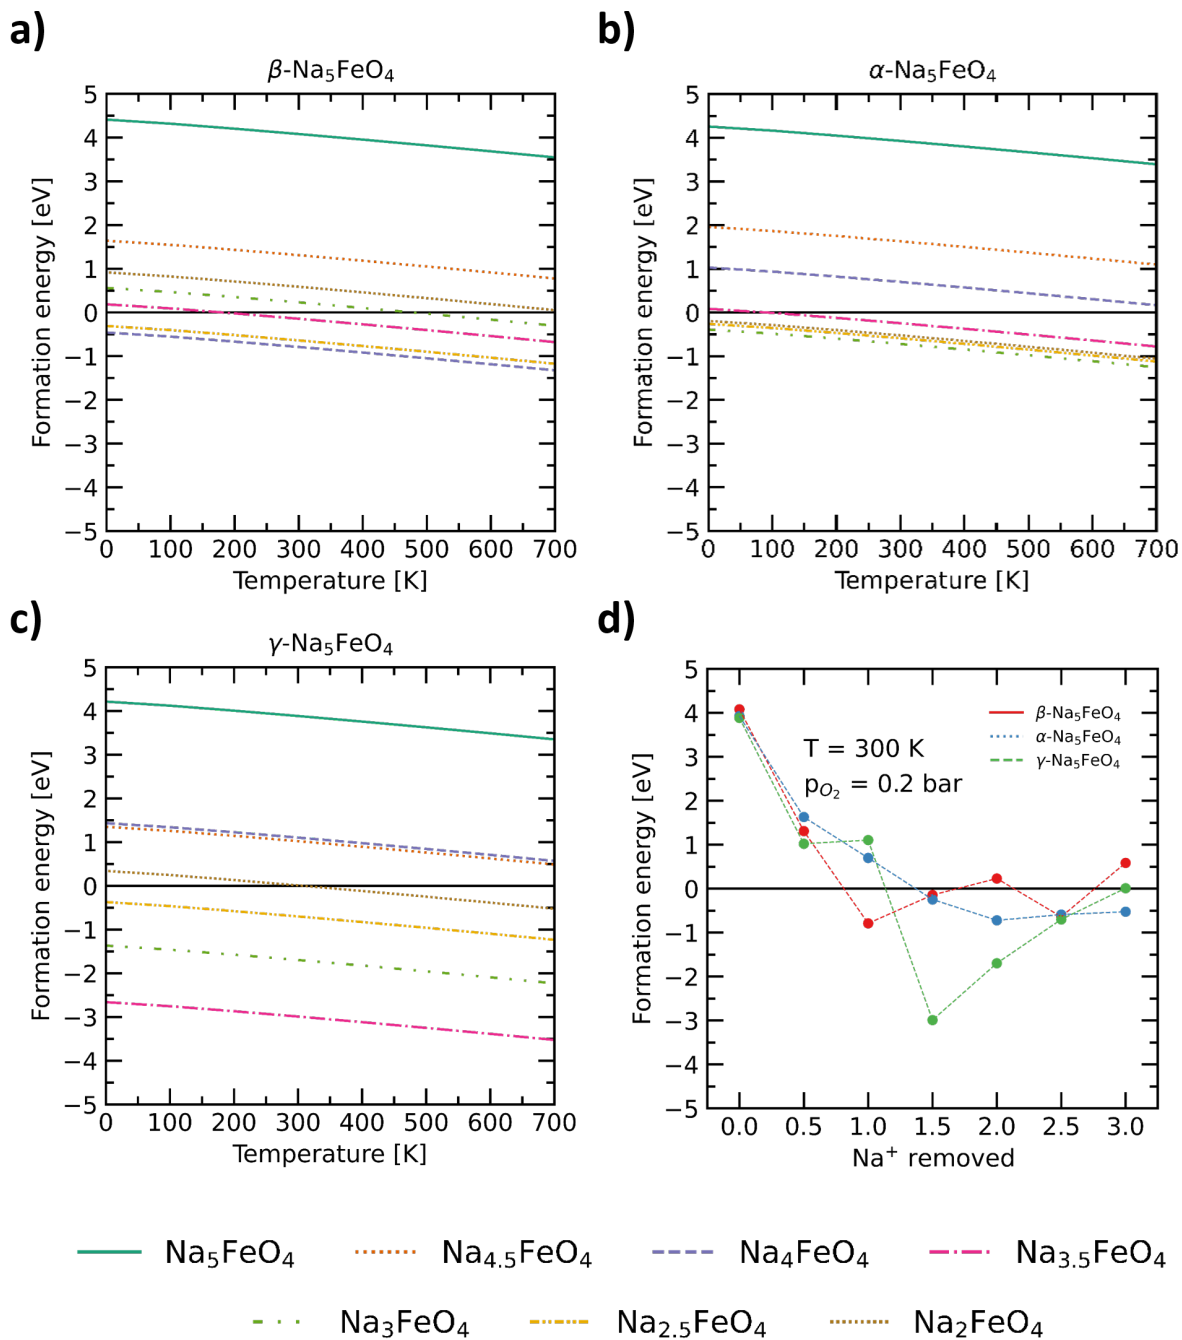

Figure S7: The evolution of oxygen vacancy formation energies as a function of temperature. Each line corresponds to a given desodiation level for each polymorph (a-c) for a fixed oxygen partial pressure ( $p_{\text{O}_2} = 0.2 \text{ bar}$ ), while d) shows the evolution of the formation energies for each polymorph as a function of desodiation at a fixed temperature (300 K) and oxygen partial pressure (0.2 bar).

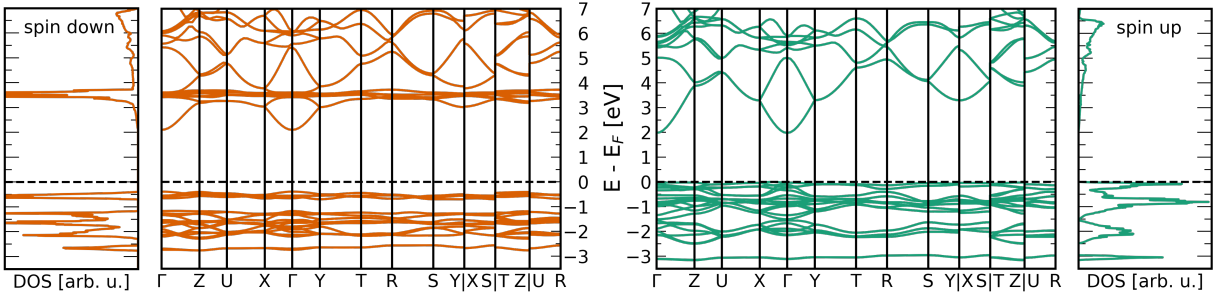

Figure S8: Total density of states and band structure along a high-symmetry path in the BZ for the  $\beta$ -phase, split into contributions from the spin down and spin up channels, respectively, obtained from GGA+U calculations. The Fermi-level ( $E_F$ ) is by convention set to 0 and is indicated by a horizontal, dashed black line.

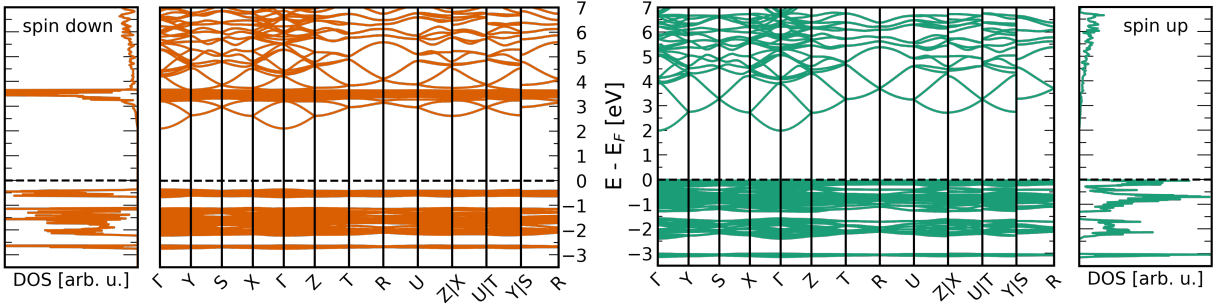

Figure S9: Total density of states and band structure along a high-symmetry path in the Brillouin zone for  $\alpha$ - $\text{Na}_5\text{FeO}_4$ , split into contributions from the spin down and spin up channels, respectively, obtained from GGA+U calculations. The Fermi-level is by convention set to 0 and is indicated by a horizontal, dashed black line.

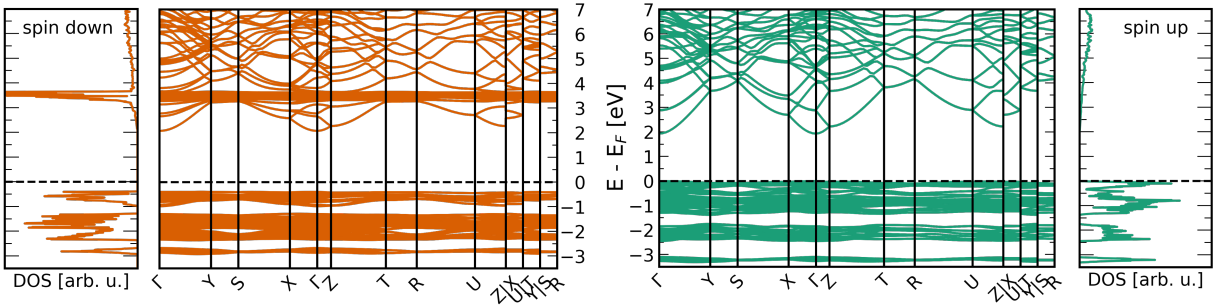

Figure S10: Total density of states and band structure along a high-symmetry path in the Brillouin zone for  $\gamma$ - $\text{Na}_5\text{FeO}_4$ , split into contributions from the spin down and spin up channels, respectively, obtained from GGA+U calculations. The Fermi-level is by convention set to 0 and is indicated by a horizontal, dashed black line.

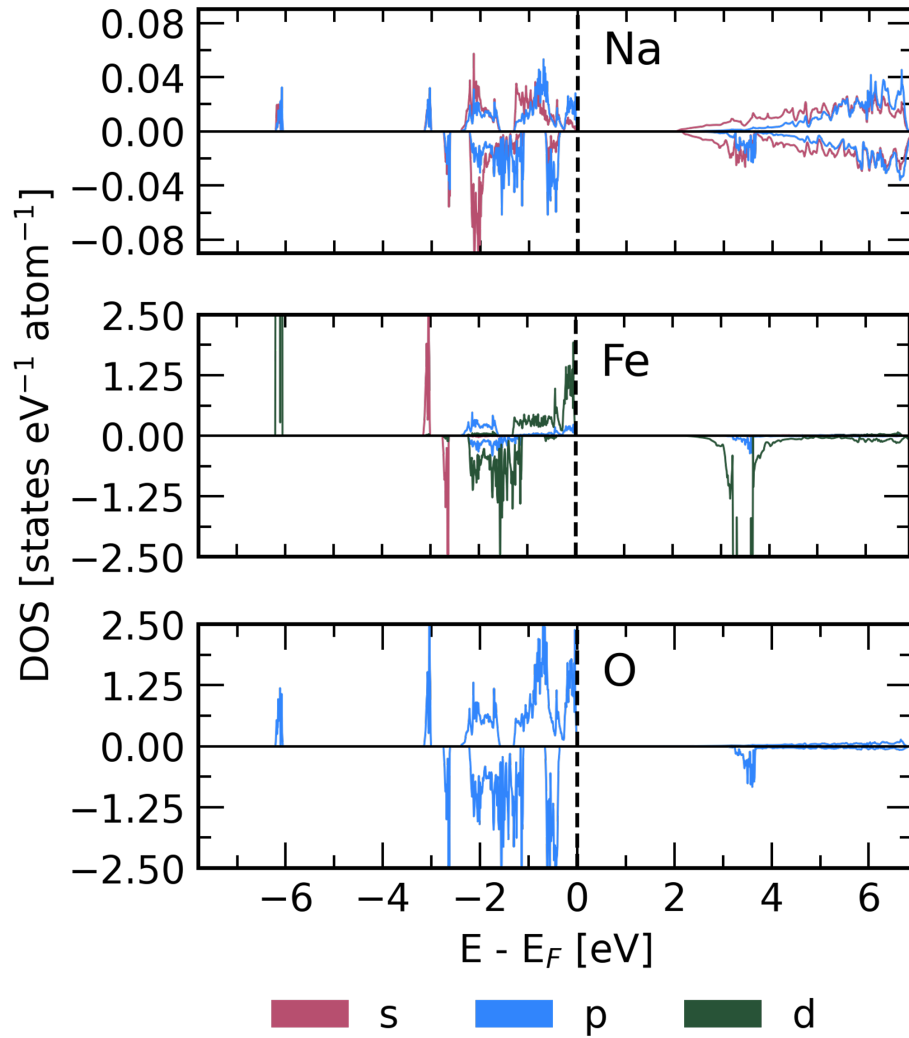

Figure S11: Site-projected electronic density of states for Na, Fe and O, respectively, for  $\alpha$ - $\text{Na}_5\text{FeO}_4$  obtained from GGA+U calculations. The spin up channel is plotted with positive values and the spin down channel is plotted with negative values. The Fermi-level is by convention set to 0 and is indicated by a vertical, dashed black line.

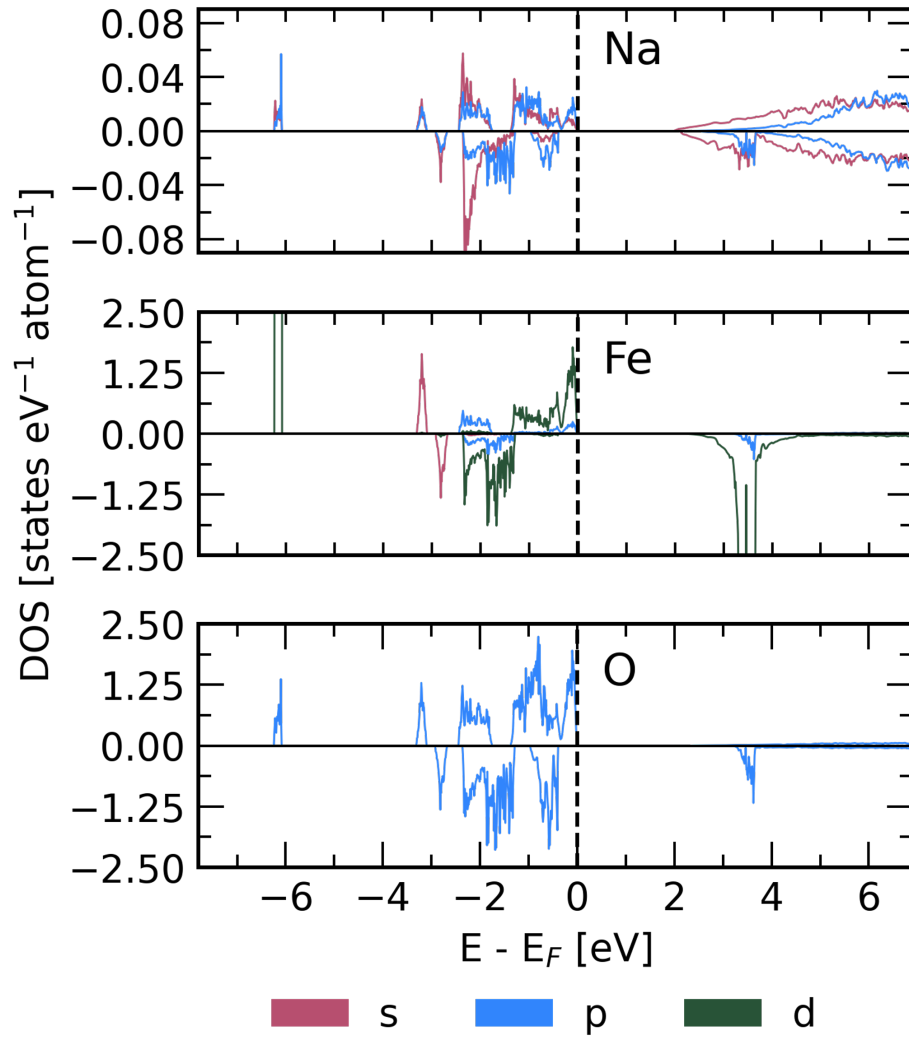

Figure S12: Site-projected electronic density of states for Na, Fe and O, respectively, for  $\gamma$ - $\text{Na}_5\text{FeO}_4$  obtained from GGA+U calculations. The spin up channel is plotted with positive values and the spin down channel is plotted with negative values. The Fermi-level is by convention set to 0 and is indicated by a vertical, dashed black line.

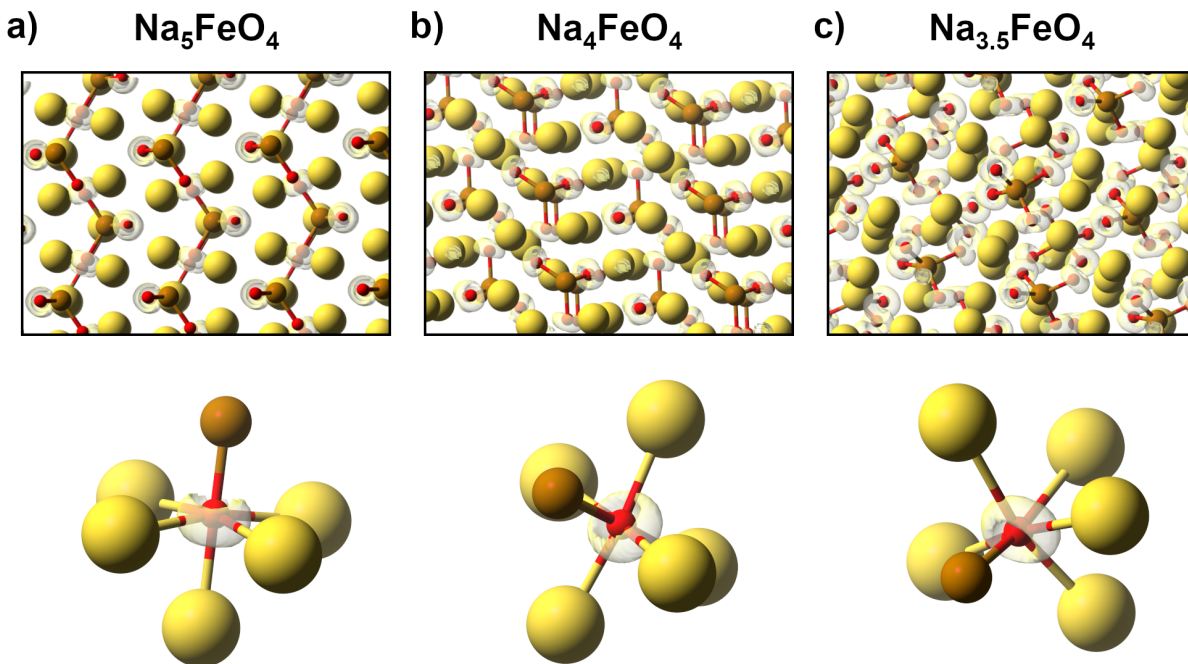

Figure S13: The electronic localisation function computed for **a)**  $\text{Na}_5\text{FeO}_4$ , **b)**  $\text{Na}_4\text{FeO}_4$  and **c)**  $\text{Na}_{3.5}\text{FeO}_4$  with an isosurface value of 0.65. A cutout of each crystal structure is shown together with an isolated oxide ion and its nearest neighbours. There is no discernable change in the localised electron pairs surrounding the oxygen ions throughout each desodiation step, showing that these are predicted to be inactive in the redox process.

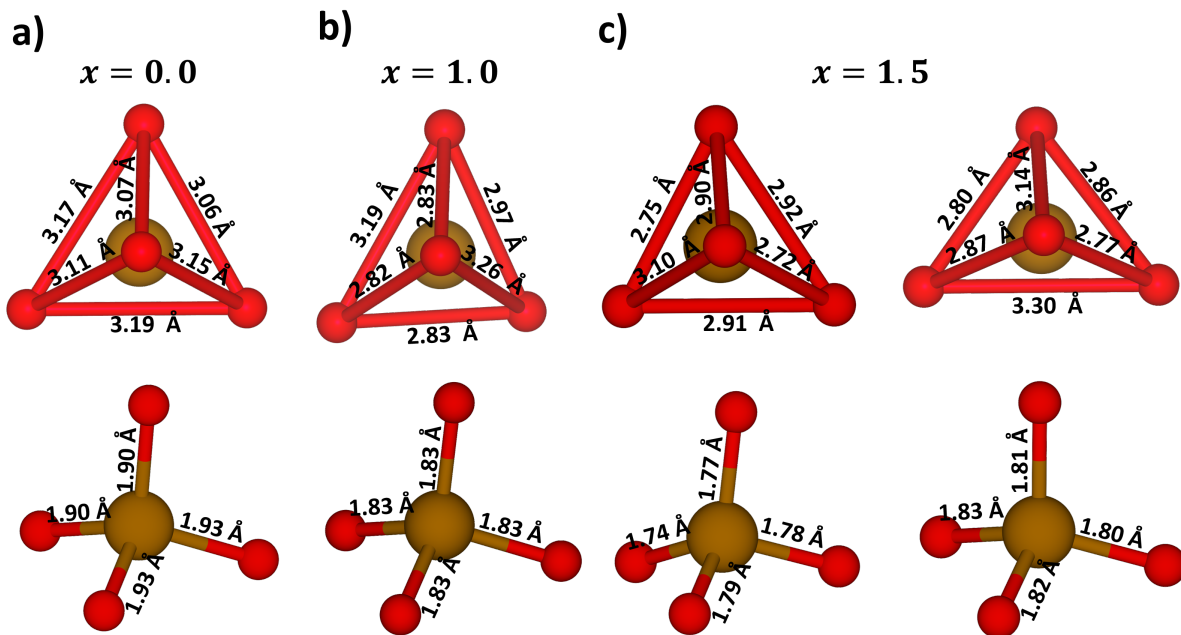

Figure S14: O-O and Fe-O distances in  $\text{Na}_{5-x}\text{FeO}_4$  for **a)**  $x = 0.0$ , **b)**  $x = 1.0$  and **c)**  $x = 1.5$ . There is a contraction of certain O-O distances as the compound is desodiated, as well as a shortening of the Fe-O distances, consistent with redox contributions from both Fe and O. At  $x = 1.5$ , there is a disproportionation between two distinct  $\text{FeO}_4$ -tetrahedra, where one is essentially unchanged from  $x = 1.0$  and the other has further contraction of both O-O and Fe-O distances.

## 2 Supplementary tables

Table S1: List of all starting geometries and their corresponding space groups. The reference structure along with its Materials Project- (mp) or ICSD-identifier is given depending on the source.

| Label                               | Space group                              | Crystal system | Reference compound               | Reference   |
|-------------------------------------|------------------------------------------|----------------|----------------------------------|-------------|
| <i>C2/m</i>                         | <i>C2/m</i> (12)                         | Monoclinic     | Li <sub>5</sub> AuO <sub>4</sub> | mp-1222442  |
| <i>P2<sub>1</sub>/c</i> #1          | <i>P2<sub>1</sub>/c</i> (4)              |                | Rb <sub>5</sub> FeO <sub>4</sub> | mp-770083   |
| <i>P2<sub>1</sub>/c</i> #2          |                                          |                | Li <sub>5</sub> FeO <sub>4</sub> | mp-771402   |
| <i>P2<sub>1</sub>/c</i> #3          |                                          |                | Cs <sub>5</sub> FeO <sub>4</sub> | ICSD-414483 |
| <i>P2<sub>1</sub>/c</i> #4          |                                          |                | Rb <sub>5</sub> FeO <sub>4</sub> | mp-770716   |
| <i>Aea2</i>                         | <i>Aea2</i> (41)                         | Orthorhombic   | Li <sub>5</sub> CoO <sub>4</sub> | mp-775093   |
| <i>Fddd</i>                         | <i>Fddd</i> (70)                         |                | Li <sub>5</sub> AuO <sub>4</sub> | mp-757242   |
| <i>Pbca</i> #1                      | <i>Pbca</i> (61)                         |                | Na <sub>5</sub> FeO <sub>4</sub> | ICSD-2485   |
| <i>Pbca</i> #2                      |                                          |                | Na <sub>5</sub> CrO <sub>4</sub> | mp-780922   |
| <i>Pmmn</i>                         | <i>Pmmn</i> (59)                         |                | Na <sub>5</sub> CrO <sub>4</sub> | mp-780916   |
| <i>Pmn2<sub>1</sub></i>             | <i>Pmn2<sub>1</sub></i> (31)             |                | Na <sub>5</sub> MnO <sub>4</sub> | ICSD-47101  |
| <i>Pnmm</i>                         | <i>Pnmm</i> (58)                         |                | Li <sub>5</sub> CoO <sub>4</sub> | mp-773454   |
| <i>P4<sub>1</sub>2<sub>1</sub>2</i> | <i>P4<sub>1</sub>2<sub>1</sub>2</i> (92) | Tetragonal     | Na <sub>5</sub> LaO <sub>4</sub> | mp-37207    |
| <i>P4<sub>2</sub>/nmc</i>           | <i>P4<sub>2</sub>/nmc</i> (137)          |                | Li <sub>5</sub> GaO <sub>4</sub> | mp-780218   |
| <i>P1</i>                           | <i>P1</i> (1)                            | Triclinic      | Li <sub>5</sub> FeO <sub>4</sub> | mp-780192   |
| <i>P1̄</i>                          | <i>P1̄</i> (2)                           |                | K <sub>5</sub> InO <sub>4</sub>  | ICSD-74911  |



Table S2: Overview of the relative equilibrium energies ( $\Delta E$ ) with respect to the most stable structure ( $\beta$ ), the equilibrium volumes ( $V_0$ ), the bulk moduli ( $B_0$ ) and its pressure derivative ( $B'_0$ ) of all starting geometries

| Structure                                             | $\Delta E$ [eV f.u. <sup>-1</sup> ] | $V_0$ [Å <sup>3</sup> f.u. <sup>-1</sup> ] | $B_0$ [GPa] | $B'_0$ |
|-------------------------------------------------------|-------------------------------------|--------------------------------------------|-------------|--------|
| <i>Pmmn</i> ( $\beta$ )                               | 0.000                               | 148.25                                     | 53          | 4.87   |
| <i>Pbca</i> #2 ( $\alpha$ )                           | 0.027                               | 147.36                                     | 52          | 5.71   |
| <i>Pbca</i> #1 ( $\gamma$ )                           | 0.086                               | 144.77                                     | 47          | 4.33   |
| <i>Pmn2</i> <sub>1</sub>                              | 0.131                               | 142.36                                     | 53          | 5.44   |
| <i>P2</i> <sub>1</sub> / <i>c</i> #1                  | 0.160                               | 146.05                                     | 42          | 6.29   |
| <i>P2</i> <sub>1</sub> / <i>c</i> #3                  | 0.168                               | 148.44                                     | 49          | 5.84   |
| <i>P2</i> <sub>1</sub> / <i>c</i> #2                  | 0.283                               | 141.64                                     | 47          | 5.54   |
| <i>Aea2</i>                                           | 0.355                               | 147.43                                     | 53          | 3.08   |
| <i>Pnnm</i>                                           | 0.367                               | 144.94                                     | 39          | 5.95   |
| <i>P1</i>                                             | 0.402                               | 150.22                                     | 48          | 4.73   |
| <i>P2</i> <sub>1</sub> / <i>c</i> #4                  | 0.604                               | 148.66                                     | 39          | 5.37   |
| <i>P4</i> <sub>2</sub> / <i>nmc</i>                   | 0.933                               | 152.97                                     | 45          | 5.87   |
| <i>Fddd</i>                                           | 1.159                               | 145.38                                     | 53          | 3.83   |
| <i>C2/m</i>                                           | 1.173                               | 145.69                                     | 52          | 3.20   |
| <i>P</i> $\bar{1}$                                    | 1.528                               | 130.59                                     | 56          | 3.24   |
| <i>P4</i> <sub>1</sub> <i>2</i> <sub>1</sub> <i>2</i> | 1.900                               | 150.31                                     | 45          | 10.92  |

Table S3: The full symmetrised elastic moduli for all three polymorphs

|                                            |           | <b>XX</b> | <b>YY</b> | <b>ZZ</b> | <b>XY</b> | <b>XZ</b> | <b>YZ</b> |
|--------------------------------------------|-----------|-----------|-----------|-----------|-----------|-----------|-----------|
| $\beta$ -Na <sub>5</sub> FeO <sub>4</sub>  | <b>XX</b> | 890.63    | 321.25    | 395.46    | 0.0       | 0.0       | 0.0       |
|                                            | <b>YY</b> | 321.25    | 968.50    | 306.13    | 0.0       | 0.0       | 0.0       |
|                                            | <b>ZZ</b> | 395.46    | 306.13    | 951.53    | 0.0       | 0.0       | 0.0       |
|                                            | <b>XY</b> | 0.0       | 0.0       | 0.0       | 193.10    | 0.0       | 0.0       |
|                                            | <b>XZ</b> | 0.0       | 0.0       | 0.0       | 0.0       | 338.76    | 0.0       |
|                                            | <b>YZ</b> | 0.0       | 0.0       | 0.0       | 0.0       | 0.0       | 148.86    |
|                                            |           | <b>XX</b> | <b>YY</b> | <b>ZZ</b> | <b>XY</b> | <b>XZ</b> | <b>YZ</b> |
| $\alpha$ -Na <sub>5</sub> FeO <sub>4</sub> | <b>XX</b> | 782.13    | 396.78    | 353.29    | 0.0       | 0.0       | 0.0       |
|                                            | <b>YY</b> | 396.78    | 799.82    | 381.03    | 0.0       | 0.0       | 0.0       |
|                                            | <b>ZZ</b> | 353.29    | 381.03    | 894.43    | 0.0       | 0.0       | 0.0       |
|                                            | <b>XY</b> | 0.0       | 0.0       | 0.0       | 304.24    | 0.0       | 0.0       |
|                                            | <b>XZ</b> | 0.0       | 0.0       | 0.0       | 0.0       | 315.73    | 0.0       |
|                                            | <b>YZ</b> | 0.0       | 0.0       | 0.0       | 0.0       | 0.0       | 279.05    |
|                                            |           | <b>XX</b> | <b>YY</b> | <b>ZZ</b> | <b>XY</b> | <b>XZ</b> | <b>YZ</b> |
| $\gamma$ -Na <sub>5</sub> FeO <sub>4</sub> | <b>XX</b> | 704.97    | 278.57    | 326.51    | 0.0       | 0.0       | 0.0       |
|                                            | <b>YY</b> | 278.57    | 907.28    | 307.65    | 0.0       | 0.0       | 0.0       |
|                                            | <b>ZZ</b> | 326.511   | 307.65    | 874.496   | 0.0       | 0.0       | 0.0       |
|                                            | <b>XY</b> | 0.0       | 0.0       | 0.0       | 275.68    | 0.0       | 0.0       |
|                                            | <b>XZ</b> | 0.0       | 0.0       | 0.0       | 0.0       | 286.97    | 0.0       |
|                                            | <b>YZ</b> | 0.0       | 0.0       | 0.0       | 0.0       | 0.0       | 260.57    |

Table S4: Structural data for the three low energy polymorphs identified in the calculations. Experimental values for the  $\gamma$ -polymorph (ICSD #2485) given in parenthesis

| Phase                                                     | Lattice parameters [ $\text{\AA}$ ] |                  |                    | Wyckoff site occupation |              |          |          |          |
|-----------------------------------------------------------|-------------------------------------|------------------|--------------------|-------------------------|--------------|----------|----------|----------|
|                                                           | <i>a</i>                            | <i>b</i>         | <i>c</i>           | Site label              | Wyckoff site | <i>x</i> | <i>y</i> | <i>z</i> |
| $\beta$ -Na <sub>5</sub> FeO <sub>4</sub><br><i>Pmmn</i>  | 7.228                               | 7.472            | 5.473              | Na1                     | 8 <i>g</i>   | 0.4892   | 0.4434   | 0.2575   |
|                                                           |                                     |                  |                    | Na2                     | 2 <i>b</i>   | 0.2500   | 0.7500   | 0.1865   |
|                                                           |                                     |                  |                    | Fe1                     | 2 <i>a</i>   | 0.2500   | 0.2500   | 0.7815   |
|                                                           |                                     |                  |                    | O1                      | 4 <i>e</i>   | 0.4739   | 0.4688   | -0.0270  |
|                                                           |                                     |                  |                    | O2                      | 4 <i>f</i>   | 0.4739   | 0.25000  | 0.5904   |
| $\gamma$ -Na <sub>5</sub> FeO <sub>4</sub><br><i>Pbca</i> | 10.523<br>(10.334)                  | 6.023<br>(5.974) | 18.196<br>(18.082) | Na1                     | 8 <i>c</i>   | 0.1738   | 0.6039   | 0.8286   |
|                                                           |                                     |                  |                    | Na2                     | 8 <i>c</i>   | 0.0609   | 0.5827   | 0.4350   |
|                                                           |                                     |                  |                    | Na3                     | 8 <i>c</i>   | 0.4221   | 0.6002   | 0.7522   |
|                                                           |                                     |                  |                    | Na4                     | 8 <i>c</i>   | 0.3359   | 0.5906   | 0.5024   |
|                                                           |                                     |                  |                    | Na5                     | 8 <i>c</i>   | 0.3010   | 0.5758   | 0.1408   |
|                                                           |                                     |                  |                    | Fe1                     | 8 <i>c</i>   | 0.0400   | 0.6730   | 0.1236   |
|                                                           |                                     |                  |                    | O1                      | 8 <i>c</i>   | 0.3643   | 0.7635   | 0.3746   |
|                                                           |                                     |                  |                    | O2                      | 8 <i>c</i>   | 0.1257   | 0.7655   | 0.2124   |
|                                                           |                                     |                  |                    | O3                      | 8 <i>c</i>   | 0.1327   | 0.6968   | 0.5450   |
| $\alpha$ -Na <sub>5</sub> FeO <sub>4</sub><br><i>Pbca</i> | 10.597                              | 10.360           | 10.710             | Na1                     | 8 <i>c</i>   | 0.1067   | 0.1682   | 0.6156   |
|                                                           |                                     |                  |                    | Na2                     | 8 <i>c</i>   | 0.1160   | 0.6437   | 0.4005   |
|                                                           |                                     |                  |                    | Na3                     | 8 <i>c</i>   | 0.1204   | 0.6034   | 0.6637   |
|                                                           |                                     |                  |                    | Na4                     | 8 <i>c</i>   | 0.1220   | 0.0852   | 0.3566   |
|                                                           |                                     |                  |                    | Na5                     | 8 <i>c</i>   | 0.1529   | 0.1380   | 0.8840   |
|                                                           |                                     |                  |                    | Fe1                     | 8 <i>c</i>   | 0.1466   | 0.6136   | 0.1300   |
|                                                           |                                     |                  |                    | O1                      | 8 <i>c</i>   | 0.0250   | 0.7271   | 0.0493   |
|                                                           |                                     |                  |                    | O2                      | 8 <i>c</i>   | 0.0512   | 0.5028   | 0.2426   |
|                                                           |                                     |                  |                    | O3                      | 8 <i>c</i>   | 0.2420   | -0.0011  | 0.5214   |
|                                                           |                                     |                  | O4                 | 8 <i>c</i>              | 0.2452       | 0.7223   | 0.2392   |          |

Table S5: Summary of vacancy jumps, identified by which symmetry equivalent sites the jump is between and with jump length ( $\text{\AA}$ ) based on the distance between the sites in the equilibrium structure, jump barriers (eV) calculated using the cNEB method and diffusion coefficients ( $\text{cm}^2 \text{s}^{-1}$ ) calculated at 300 K according to equation 4. Jumps marked with asterisk are not properly described as a vacancy jump.

| <b>Phase</b> | <b>Jump</b> | <b>Label</b> | <b>Length</b> | <b>Barrier</b> | <b>Diffusion coefficient</b> |
|--------------|-------------|--------------|---------------|----------------|------------------------------|
| $\beta$      | Na1-Na1     | 01           | 2.79          | 0.207          | $2.7 \times 10^{-6}$         |
|              | Na1-Na1     | 02           | 2.89          | 0.036          | $2.1 \times 10^{-3}$         |
|              | Na1-Na2     | 03           | 2.90          | 0.301          | $7.3 \times 10^{-8}$         |
|              | Na1-Na1     | 04           | 2.95          | 0.405          | $1.4 \times 10^{-9}$         |
| $\alpha$     | Na3-Na4     | 01           | 2.84          | 0.076          | $4.3 \times 10^{-4}$         |
|              | Na2-Na3     | 02           | 2.85          | 0.295          | $8.9 \times 10^{-8}$         |
|              | Na1-Na4     | 03           | 2.91          | 0.350          | $1.1 \times 10^{-8}$         |
|              | Na2-Na4     | 04           | 2.88          | 0.425          | $6.0 \times 10^{-10}$        |
|              | Na1-Na5     | 05           | 2.93          | 0.405          | $1.4 \times 10^{-9}$         |
|              | Na2-Na5     | 06           | 2.95          | 0.373          | $4.7 \times 10^{-9}$         |
|              | Na4-Na5     | 07           | 2.90          | 0.470          | $1.1 \times 10^{-10}$        |
|              | Na1-Na3     | 08           | 3.01          | 0.360          | $8.0 \times 10^{-9}$         |
|              | Na3-Na5     | 09           | 2.96          | 0.443          | $3.1 \times 10^{-10}$        |
|              | Na1-Na2*    | 10           | 3.07          | 0.071          | $6.0 \times 10^{-4}$         |
| $\gamma$     | Na2-Na2     | 01           | 2.87          | 0.120          | $8.0 \times 10^{-5}$         |
|              | Na1-Na2     | 02           | 2.95          | 0.072          | $5.5 \times 10^{-4}$         |
|              | Na1-Na3*    | 03           | 2.96          | 0.035          | $2.2 \times 10^{-3}$         |
|              | Na1-Na3     | 04           | 3.03          | 0.364          | $7.0 \times 10^{-9}$         |

Table S6: Summary of the percolating diffusion paths of jumps between Na-sites, where the distance between each Na<sup>+</sup>-ion is less than 3 Å, as calculated using the cNEB-method. The path is described by which symmetry equivalent Na<sup>+</sup>-ions, as detailed in Table S4, are involved in each path. For each diffusion path, the direction of the net movement, the overall activation barrier ( $E_a$ ) associated with the energy path and the diffusion coefficient at 300 K ( $D_{Na^+}$ ) as calculated from Equation 4 using the limiting jump along the path. Diffusion paths marked with an asterisk (\*) include jumps which are not properly described as a vacancy jump, and values are for this reason more uncertain.

| Phase                                      | No. | Path                                 | Direction       | $E_a$ [eV]   | $D_{Na^+}(T = 300 \text{ K})$ [cm <sup>2</sup> s <sup>-1</sup> ] |
|--------------------------------------------|-----|--------------------------------------|-----------------|--------------|------------------------------------------------------------------|
| $\beta$ -Na <sub>5</sub> FeO <sub>4</sub>  | 1   | Na1 → Na1 → Na1                      | [110]           | 0.206        | $2.7 \times 10^{-6}$                                             |
|                                            | 2   | Na1 → Na2<br>→ Na1 → Na1             | [1 $\bar{1}$ 0] | 0.301        | $7.3 \times 10^{-8}$                                             |
|                                            | 4   | Na1 → Na2<br>→ Na1 → Na1             | [1 $\bar{1}$ 0] | 0.405        | $1.4 \times 10^{-9}$                                             |
|                                            | 3   | Na1 → Na1 → Na1                      | [110]           | 0.406        | $1.4 \times 10^{-9}$                                             |
|                                            | 5   | Na1 → Na1 → Na1                      | [001]           | 0.406        | $1.4 \times 10^{-9}$                                             |
| $\alpha$ -Na <sub>5</sub> FeO <sub>4</sub> | 1   | Na3 → Na4<br>→ Na2 → Na3             | [001]           | 0.434        | $6.0 \times 10^{-10}$                                            |
|                                            | 2   | Na5 → Na4<br>→ Na2 → Na5             | [010]           | 0.470        | $1.1 \times 10^{-10}$                                            |
|                                            | 3   | Na3 → Na4 → Na1<br>→ Na5 → Na2 → Na3 | [001]           | 0.478        | $1.1 \times 10^{-10}$                                            |
|                                            | 4*  | Na1 → Na3 → Na4<br>→ Na2 → Na2 → Na1 | [100]           | $\geq 0.521$ | $\leq 1.1 \times 10^{-10}$                                       |
| $\gamma$ -Na <sub>5</sub> FeO <sub>4</sub> | 1*  | Na1 → Na3 → Na1                      | [100]           | $\geq 0.387$ | $\leq 7.0 \times 10^{-9}$                                        |
|                                            | 2*  | Na1 → Na3 → Na1<br>→ Na2 → Na2 → Na1 | [001]           | $\geq 0.424$ | $\leq 7.0 \times 10^{-9}$                                        |

Table S7: Structural data for the phases found along the convex hull in the cycling interval  $\text{Na}_5\text{FeO}_4 \rightleftharpoons \text{Na}_{3.5}\text{FeO}_4 + 1.5 \text{Na}^+$ . The pristine phase,  $\text{Na}_5\text{FeO}_4$  is not given here and can be found in Table S4.

| Phase                         | Lattice parameters [Å]                                     |          |           | Wyckoff site occupation |              |          |          |          |
|-------------------------------|------------------------------------------------------------|----------|-----------|-------------------------|--------------|----------|----------|----------|
|                               | <i>a</i>                                                   | <i>b</i> | <i>c</i>  | Site label              | Wyckoff site | <i>x</i> | <i>y</i> | <i>z</i> |
| $\text{Na}_4\text{FeO}_4$     | 5.817                                                      | 5.826    | 8.374     | Na1                     | <i>2i</i>    | 0.0494   | 0.7242   | 0.4321   |
| $P\bar{1}$                    | $\alpha = 87.923$<br>$\beta = 72.036$<br>$\gamma = 69.133$ |          |           | Na2                     | <i>2i</i>    | 0.2099   | 0.7458   | 0.0193   |
|                               |                                                            |          |           | Na3                     | <i>2i</i>    | 0.2394   | 0.2369   | 0.1697   |
|                               |                                                            |          |           | Na4                     | <i>2i</i>    | 0.4146   | 0.7849   | 0.6275   |
|                               |                                                            |          |           | Fe1                     | <i>2i</i>    | 0.4040   | 0.2834   | 0.7504   |
|                               |                                                            |          |           | O1                      | <i>2i</i>    | 0.5618   | 0.4784   | 0.8019   |
|                               |                                                            |          |           | O2                      | <i>2i</i>    | 0.3144   | -0.0310  | 0.3820   |
|                               |                                                            |          |           | O3                      | <i>2i</i>    | 0.8297   | 0.4984   | 0.3393   |
|                               |                                                            |          |           | O4                      | <i>2i</i>    | 0.7640   | 0.8875   | 0.1003   |
| $\text{Na}_{3.5}\text{FeO}_4$ | 9.561                                                      | 9.090    | 11.159    | Na1                     | <i>2a</i>    | 0.5282   | 0.6410   | 0.1241   |
| $P2_1$                        | $\beta = 95.854$                                           |          |           | Na2                     | <i>2a</i>    | 0.4721   | 0.3728   | 0.3754   |
|                               |                                                            |          |           | Na3                     | <i>2a</i>    | -0.0673  | 0.7083   | 0.8825   |
|                               |                                                            |          |           | Na4                     | <i>2a</i>    | 0.0688   | 0.3054   | 0.6183   |
|                               |                                                            |          |           | Na5                     | <i>2a</i>    | 0.2176   | 0.1768   | 0.3667   |
|                               |                                                            |          |           | Na6                     | <i>2a</i>    | 0.8107   | 0.0616   | 0.8968   |
|                               |                                                            |          |           | Na7                     | <i>2a</i>    | 0.4104   | -0.0273  | 0.1228   |
|                               |                                                            |          |           | Na8                     | <i>2a</i>    | 0.5885   | 0.0407   | 0.3771   |
|                               |                                                            |          |           | Na9                     | <i>2a</i>    | 0.2175   | 0.3389   | 0.8673   |
|                               |                                                            |          |           | Na10                    | <i>2a</i>    | 0.8111   | 0.4536   | 0.3965   |
|                               |                                                            |          |           | Na11                    | <i>2a</i>    | 0.1528   | 0.5177   | 0.3779   |
|                               |                                                            |          |           | Na12                    | <i>2a</i>    | 0.8479   | 0.4978   | 0.1214   |
|                               |                                                            |          |           | Na13                    | <i>2a</i>    | 0.2949   | 0.6659   | 0.8719   |
|                               |                                                            |          |           | Na14                    | <i>2a</i>    | 0.7069   | 0.3483   | 0.6285   |
|                               |                                                            |          |           | Fe1                     | <i>2a</i>    | 0.1083   | 0.8647   | 0.1272   |
|                               |                                                            |          |           | Fe2                     | <i>2a</i>    | 0.8920   | 0.1504   | 0.3731   |
|                               |                                                            |          |           | Fe3                     | <i>2a</i>    | 0.3744   | 0.2083   | 0.6176   |
|                               |                                                            | Fe4      | <i>2a</i> | 0.6263                  | 0.8054       | 0.8827   |          |          |
|                               |                                                            | O1       | <i>2a</i> | 0.0690                  | 0.7196       | 0.2269   |          |          |
|                               |                                                            | O2       | <i>2a</i> | -0.0664                 | 0.2956       | 0.2748   |          |          |
|                               |                                                            | O3       | <i>2a</i> | 0.5059                  | 0.3059       | 0.7138   |          |          |
|                               |                                                            | O4       | <i>2a</i> | 0.4958                  | 0.7065       | 0.7864   |          |          |
|                               |                                                            | O5       | <i>2a</i> | -0.0212                 | -0.0568      | 0.0209   |          |          |
|                               |                                                            | O6       | <i>2a</i> | 0.0208                  | 0.0735       | 0.4803   |          |          |
|                               |                                                            | O7       | <i>2a</i> | 0.3893                  | 0.0511       | 0.5173   |          |          |
|                               |                                                            | O8       | <i>2a</i> | 0.6100                  | -0.0383      | -0.0163  |          |          |
|                               |                                                            | O9       | <i>2a</i> | 0.1817                  | 0.5178       | 0.7267   |          |          |
|                               |                                                            | O10      | <i>2a</i> | 0.8182                  | 0.4984       | 0.7734   |          |          |
|                               |                                                            | O11      | <i>2a</i> | 0.2681                  | 0.3788       | 0.2303   |          |          |
|                               |                                                            | O12      | <i>2a</i> | 0.7326                  | 0.6373       | 0.2693   |          |          |
|                               |                                                            | O13      | <i>2a</i> | 0.2295                  | 0.7989       | 0.0278   |          |          |
|                               |                                                            | O14      | <i>2a</i> | 0.7697                  | 0.2150       | 0.4710   |          |          |
|                               |                                                            | O15      | <i>2a</i> | 0.3008                  | 0.3445       | 0.5107   |          |          |
|                               |                                                            | O16      | <i>2a</i> | 0.7002                  | 0.6691       | -0.0107  |          |          |

Table S8: Structural data for the phases found along the convex hull in the cycling interval  $\text{Na}_{3.5}\text{FeO}_3 \rightleftharpoons \text{Na}_2\text{FeO}_3 + 1.5 \text{Na}^+$ .

| Phase                         | Lattice parameters [Å] |          |          | Wyckoff site occupation |              |          |          |          |
|-------------------------------|------------------------|----------|----------|-------------------------|--------------|----------|----------|----------|
|                               | <i>a</i>               | <i>b</i> | <i>c</i> | Site label              | Wyckoff site | <i>x</i> | <i>y</i> | <i>z</i> |
| $\text{Na}_{3.5}\text{FeO}_3$ | 6.027                  | 6.407    | 6.276    | Na1                     | 1 <i>a</i>   | 0.9907   | 0.3781   | 0.2207   |
| <i>P1</i>                     | $\alpha = 120.488$     |          |          | Na2                     | 1 <i>a</i>   | 0.7806   | 0.0002   | 0.8254   |
|                               | $\beta = 91.058$       |          |          | Na3                     | 1 <i>a</i>   | 0.6611   | 0.6998   | 0.1807   |
|                               | $\gamma = 88.168$      |          |          | Na4                     | 1 <i>a</i>   | 0.3646   | 0.3112   | 0.8779   |
|                               |                        |          |          | Na5                     | 1 <i>a</i>   | 0.3503   | -0.0100  | 0.1333   |
|                               |                        |          |          | Na6                     | 1 <i>a</i>   | 0.0314   | 0.6263   | 0.8399   |
|                               |                        |          |          | Na7                     | 1 <i>a</i>   | 0.0271   | 0.0592   | 0.4870   |
|                               |                        |          |          | Fe1                     | 1 <i>a</i>   | 0.3283   | 0.7086   | 0.5166   |
|                               |                        |          |          | Fe2                     | 1 <i>a</i>   | 0.6171   | 0.3519   | 0.5171   |
|                               |                        |          |          | O1                      | 1 <i>a</i>   | 0.7355   | 0.0746   | 0.2271   |
|                               |                        |          |          | O2                      | 1 <i>a</i>   | 0.7413   | 0.3569   | 0.8028   |
|                               |                        |          |          | O3                      | 1 <i>a</i>   | 0.6841   | 0.6360   | 0.5060   |
|                               |                        |          |          | O4                      | 1 <i>a</i>   | 0.2918   | 0.3621   | 0.5142   |
|                               |                        |          |          | O5                      | 1 <i>a</i>   | 0.2362   | 0.6799   | 0.2016   |
|                               |                        |          |          | O6                      | 1 <i>a</i>   | 0.1782   | 0.9721   | 0.8044   |
| $\text{Na}_3\text{FeO}_3$     | 5.860                  | 12.750   | 6.268    | Na1                     | 4 <i>e</i>   | 0.0502   | 0.2221   | 0.1953   |
| <i>P2<sub>1</sub>/c</i>       | $\beta = 121.849$      |          |          | Na2                     | 4 <i>e</i>   | 0.0360   | 0.4845   | 0.2807   |
|                               |                        |          |          | Na3                     | 4 <i>e</i>   | 0.5740   | 0.5946   | 0.8588   |
|                               |                        |          |          | Fe1                     | 4 <i>e</i>   | 0.5772   | 0.3357   | 0.7564   |
|                               |                        |          |          | O1                      | 4 <i>e</i>   | -0.0588  | 0.3733   | -0.0508  |
|                               |                        |          |          | O2                      | 4 <i>e</i>   | 0.6806   | -0.0617  | 0.8019   |
|                               |                        |          |          | O3                      | 4 <i>e</i>   | 0.4776   | 0.7284   | 0.5497   |
| $\text{Na}_2\text{FeO}_3$     | 5.376                  | 9.302    | 11.060   | Na1                     | 8 <i>f</i>   | 0.7619   | 0.0784   | 0.5003   |
| <i>C2/c</i>                   | $\beta = 99.575$       |          |          | Na2                     | 4 <i>d</i>   | 0.2500   | 0.2500   | 0.5000   |
|                               |                        |          |          | Na3                     | 4 <i>e</i>   | 0.0000   | 0.0866   | 0.2500   |
|                               |                        |          |          | Fe1                     | 4 <i>e</i>   | 0.0000   | 0.7545   | 0.2500   |
|                               |                        |          |          | Fe2                     | 4 <i>e</i>   | 0.0000   | 0.4206   | 0.2500   |
|                               |                        |          |          | O1                      | 8 <i>f</i>   | 0.8493   | 0.1023   | 0.8538   |
|                               |                        |          |          | O2                      | 8 <i>f</i>   | 0.5857   | 0.0837   | 0.1491   |
|                               |                        |          |          | O3                      | 8 <i>f</i>   | 0.6508   | 0.2224   | 0.6494   |

Table S9: Summary of vacancy formation enthalpies (in eV) and vacancy concentrations (% of total oxygen in the unit cell removed) for each structure at varying levels of desodiation ( $x$  in  $\text{Na}_{5-x}\text{FeO}_4$ ).

| Label          | Desodiation level | Stoichiometry                        | Formation enthalpy | Vacancy concentration |
|----------------|-------------------|--------------------------------------|--------------------|-----------------------|
| $\beta$ -NFO   | 0.0               | $\text{Na}_5\text{FeO}_{3.9375}$     | 4.41               | 1.56 %                |
|                | 0.5               | $\text{Na}_{4.5}\text{FeO}_{3.9375}$ | 1.64               | 1.56 %                |
|                | 1.0               | $\text{Na}_4\text{FeO}_{3.9375}$     | -0.46              | 1.56 %                |
|                | 1.5               | $\text{Na}_{3.5}\text{FeO}_{3.9375}$ | 0.18               | 1.56 %                |
|                | 2.0               | $\text{Na}_3\text{FeO}_{3.9375}$     | 0.56               | 1.56 %                |
|                | 2.5               | $\text{Na}_{2.5}\text{FeO}_{3.9375}$ | -0.31              | 1.56 %                |
|                | 3.0               | $\text{Na}_2\text{FeO}_{3.9375}$     | 0.91               | 1.56 %                |
| $\alpha$ -NFO  | 0.0               | $\text{Na}_5\text{FeO}_{3.875}$      | 4.26               | 3.13 %                |
|                | 0.5               | $\text{Na}_{4.5}\text{FeO}_{3.875}$  | 1.96               | 3.13 %                |
|                | 1.0               | $\text{Na}_4\text{FeO}_{3.9375}$     | 1.03               | 1.56 %                |
|                | 1.5               | $\text{Na}_{3.5}\text{FeO}_{3.875}$  | 0.08               | 3.13 %                |
|                | 2.0               | $\text{Na}_3\text{FeO}_{3.875}$      | -0.39              | 3.13 %                |
|                | 2.5               | $\text{Na}_{2.5}\text{FeO}_{3.875}$  | -0.26              | 3.13 %                |
|                | 3.0               | $\text{Na}_2\text{FeO}_{3.9375}$     | -0.20              | 1.56 %                |
| $\gamma$ -NFO  | 0.0               | $\text{Na}_5\text{FeO}_{3.9375}$     | 4.21               | 1.56 %                |
|                | 0.5               | $\text{Na}_{4.5}\text{FeO}_{3.9375}$ | 1.35               | 1.56 %                |
|                | 1.0               | $\text{Na}_4\text{FeO}_{3.9375}$     | 1.43               | 1.56 %                |
|                | 1.5               | $\text{Na}_{3.5}\text{FeO}_{3.9375}$ | -2.66              | 1.56 %                |
|                | 2.0               | $\text{Na}_3\text{FeO}_{3.9375}$     | -1.37              | 1.56 %                |
|                | 2.5               | $\text{Na}_{2.5}\text{FeO}_{3.9375}$ | -0.37              | 1.56 %                |
|                | 3.0               | $\text{Na}_2\text{FeO}_{3.9375}$     | 0.34               | 1.56 %                |
| Convex hull #1 | 0.0               | $\text{Na}_5\text{FeO}_{3.875}$      | 4.41               | 3.13 %                |
|                | 1.0               | $\text{Na}_4\text{FeO}_{3.875}$      | 1.31               | 3.13 %                |
|                | 1.5               | $\text{Na}_{3.5}\text{FeO}_{3.875}$  | 0.05               | 3.13 %                |
| Convex hull #2 | 1.5               | $\text{Na}_{3.5}\text{FeO}_{2.9375}$ | 4.19               | 2.08 %                |
|                | 2.0               | $\text{Na}_3\text{FeO}_{2.9375}$     | 3.43               | 2.08 %                |
|                | 3.0               | $\text{Na}_2\text{FeO}_{2.9688}$     | 0.46               | 1.04 %                |



Table S10: Electronic band gaps (in eV) for all polymorphs obtained from GGA+U calculations. In all cases the total band gap comes from states in the spin up channel. All band gaps are direct, but in the valence band there are states close to  $E_F$  along the full path in BZ.

| <b>Phase</b> | <b><math>E_{g,TOT}</math></b> | <b><math>E_{g,UP}</math></b> | <b><math>E_{g,DOWN}</math></b> | <b>Kind</b> |
|--------------|-------------------------------|------------------------------|--------------------------------|-------------|
| $\beta$      | 1.98                          | 1.98                         | 2.49                           | Direct      |
| $\alpha$     | 1.94                          | 1.94                         | 2.47                           | Direct      |
| $\gamma$     | 1.99                          | 1.99                         | 2.46                           | Direct      |
